# Supplementary material for: Important factors for effective use of carbon nanotube matrices in electrochemical capacitor hybrid electrodes without binding additives
Source: Royal Society of Chemistry journal article supplement (doi:10.1039/c4ra16560h), 2015-01-01
Supplement: c4ra16560h1.pdf [file c4ra16560h1.pdf]

Electronic Supplementary Information for

**Important factors for effective use of carbon nanotube matrices in  
electrochemical capacitor hybrid electrodes without binding additives**

**Ricardo Quintero<sup>ab</sup>, Dong Young Kim<sup>a</sup>, Kei Hasegawa<sup>a</sup>, Yuki Yamada<sup>b</sup>, Atsuo Yamada<sup>b</sup>  
and Suguru Noda<sup>\*a</sup>**

*<sup>a</sup>Department of Applied Chemistry, Waseda University, 3-4-1 Okubo, Shinjuku-ku, Tokyo, 169-8555, Japan*

*<sup>b</sup>Department of Chemical System Engineering, The University of Tokyo, 7-3-1 Hongo, Bunkyo-ku, Tokyo 113-8656, Japan*

*\*E-mail: noda@waseda.jp; Tel: +81 352862769*

**Table S1** Elemental composition (wt%) of pure FWCNT electrodes processed in H<sub>2</sub>O-SDBS, NMP and EtOH determined by XRF

| Element | H <sub>2</sub> O-SDBS | NMP    | EtOH   |
|---------|-----------------------|--------|--------|
| C       | 95.031                | 97.820 | 98.437 |
| O       | 4.171                 | 2.030  | 1.465  |
| N       | N.A.                  | N.A.   | N.A.   |
| S       | 0.430                 | 0.009  | 0.009  |
| Si      | 0.066                 | 0.069  | 0.032  |
| Al      | 0.065                 | 0.038  | 0.031  |
| Fe      | 0.018                 | 0.011  | 0.008  |
| Na      | 0.071                 | N.A.   | N.A.   |
| Mg      | 0.039                 | N.A.   | N.A.   |
| Ca      | 0.038                 | 0.006  | 0.004  |
| Cl      | 0.067                 | 0.015  | 0.012  |

The FWCNTs processed in H<sub>2</sub>O-SDBS contained a larger amount of O than those processed in NMP and EtOH because oxygen functionalities were introduced during rinsing in HNO<sub>3</sub>. N was not detected in any of the FWCNTs, even for those processed in H<sub>2</sub>O-SDBS and then rinsed in HNO<sub>3</sub>. S was detected in the FWCNTs processed in H<sub>2</sub>O-SDBS (0.43 wt%), showing that some residue of SDBS remained even after removal by rinsing with boiling water and HNO<sub>3</sub>.

The FWCNTs contain small contents of Si, Al, and Fe of 0.03–0.07, 0.03–0.07, and 0.01–0.02 wt%, respectively. During FB-CVD, because of the vigorous fluidisation, the reactor wall made of quartz glass, beads and catalyst underlayer made of Al<sub>2</sub>O<sub>3</sub>, and Fe catalyst are scraped off, resulting in these contaminants in the FWCNTs.<sup>23</sup>

Na is detected only in the FWCNTs processed in H<sub>2</sub>O-SDBS, possibly from the residue of SDBS. Small contents (<<0.1 wt%) of some other elements (*i.e.*, Mg, Ca, and Cl) are also detected, but their origin remains unclear.

**Table S2** Elemental composition (wt%) of AC2000-SWCNT (9:1) electrodes processed in H<sub>2</sub>O-SDBS, NMP, and EtOH determined by XRF

| Element | H <sub>2</sub> O-SDBS | NMP    | EtOH   |
|---------|-----------------------|--------|--------|
| C       | 91.759                | 95.835 | 96.458 |
| O       | 7.305                 | 3.904  | 3.307  |
| N       | N.A.                  | N.A.   | N.A.   |
| S       | 0.734                 | 0.041  | 0.043  |
| Si      | 0.167                 | 0.170  | 0.141  |
| Al      | 0.013                 | 0.025  | 0.020  |
| Fe      | 0.006                 | 0.003  | 0.002  |
| Ca      | N.A.                  | 0.011  | 0.013  |
| Cl      | 0.017                 | 0.010  | 0.013  |
